# Supplementary material
Source: bioRxiv or medRxiv preprint supplement (http://medrxiv.stage.highwire.org/highwire/filestream/71485/field_highwire_adjunct_files/3/2020.01.27.20016725-4.pdf)

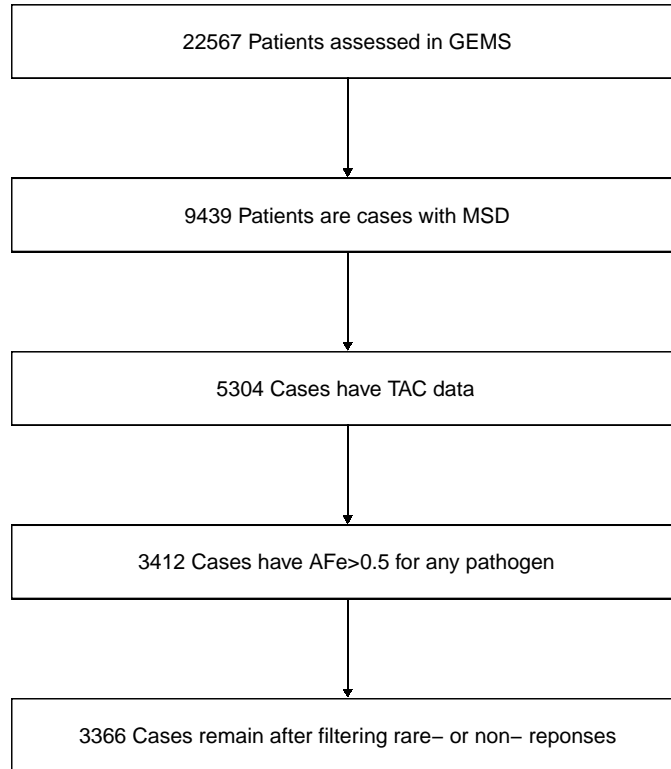

Supplement: Supplementary file [file 2020.01.27.20016725-4.pdf]
